# Supplementary material
Source: publisher site journal article supplement (https://www.dovepress.com/article/455224)
Supplement: Supplementary file 1 [file get_supplementary_file.php]

**SUPPLEMENTARY MATERIAL**

**Table S1. Scores of analytical cross-sectional studies**.

| **Studies** | **JBI** | **Inclusion criteria are clearly defined** | **The participants and the environment are described in detail** | **Exposure was validly and reliably measured** | **The criterion used to measure the condition was objective** | **Confounding factors were identified** | **Strategies for dealing with confounding factors** | **Results measured in a valid and reliable way** | **Appropriate statistical analysis was used** |
| --- | --- | --- | --- | --- | --- | --- | --- | --- | --- |
| (Aisling et al.,2016)  [40] | 6/8 | 🗶 | ✓ | ✓ | ✓ | ✓ | 🗶 | ✓ | ✓ |
| (A. Khazaei et al., 2019) [48] | 8/8 | ✓ | ✓ | ✓ | ✓ | ✓ | ✓ | ✓ | ✓ |
| (F. Araujo et al., 2020)  [5] | 7/8 | ✓ | ✓ | 🗶 | ✓ | ✓ | ✓ | ✓ | ✓ |
| (A. Carvalho et al., 2020) [45] | 6/8 | ✓ | ✓ | ✓ | ✓ | ✓ | 🗶 | 🗶 | ✓ |
| (M. Westphal et al., 2014) [49] | 5/8 | ✓ | ✓ | 🗶 | ✓ | 🗶 | 🗶 | ✓ | ✓ |
| (A.Mirzaei et al., 2022) [46] | 6/8 | ✓ | ✓ | N/A | ✓ | ✓ | ✓ | 🗶 | ✓ |
| (M. Bernaldo-De-Quirós et al., 2014) [29] | 8/8 | ✓ | ✓ | ✓ | ✓ | ✓ | ✓ | ✓ | ✓ |
| (T. Klosiewicz et al., 2019) [50] | 5/8 | 🗶 | ✓ | ✓ | ✓ | 🗶 | 🗶 | ✓ | ✓ |

Yes: ✓, No: 🗶, Not clear or Not Applicable: N/A. JBI: Joanna Briggs Institute.

**Table S2. Scores of randomised controlled trials**.

|  | (M. Mahdizadeh et al., 2019) [47] |
| --- | --- |
| JBI score | 8/13 |
| True randomisation used for assignment of participants to treatment groups | 🗶 |
| Allocation to treatment groups concealed | 🗶 |
| Treatment groups similar at the baseline | ✓ |
| Participants blinded to treatment allocation | N/A |
| Those delivering treatment blinded to treatment allocation | N/A |
| Outcomes assessors blinded to treatment allocation | ✓ |
| Treatment groups treated identically other than the intervention of interest | ✓ |
| Follow-up complete and if not, were differences between groups in terms of their follow-up adequately described and analysed? | ✓ |
| Participants analysed in the groups to which they were randomised | ✓ |
| Outcomes measured in the same way for treatment groups | ✓ |
| Outcomes measured in a reliable way | ✓ |
| Appropriate statistical analysis used | ✓ |
| Trial design appropriate for the topic, and any deviations from the standard RCT design accounted | ✓ |
|  |  |

Yes: ✓, No: 🗶, Not clear or Not Applicable: N/A; JBI: Joanna Briggs Institute

**Table S3. Scores of qualitative research**.

| **Studies** | **JBI** | **Congruence between stated philosophical perspective and research methodology** | **Congruence between research methodology and research question/objectives** | **Congruence between research methodology and methods used to collect data** | **Congruence between research methodology and representation and analysis of data** | **Congruence between research methodology and interpretation of results** | **Cultural and theoretical localisation** | **Influence of the researcher on the research and vice versa is addressed** | **Representation of participants and their voices** | **Ethical approval by an appropriate body** | **Relationship between findings and data analysis or data interpretation** |
| --- | --- | --- | --- | --- | --- | --- | --- | --- | --- | --- | --- |
| (J. Wihlborg et al., 2017) [42] | 10/10 | ✓ | ✓ | ✓ | ✓ | ✓ | ✓ | ✓ | ✓ | ✓ | ✓ |
| (A. Dadashzadeh et al., 2018) [44] | 10/10 | ✓ | ✓ | ✓ | ✓ | ✓ | ✓ | ✓ | ✓ | ✓ | ✓ |
| (A. Afshari et al., 2021) [10] | 8/10 | ✓ | ✓ | ✓ | 🗶 | ✓ | 🗶 | ✓ | ✓ | ✓ | ✓ |
| (D. Bohström et al., 2016) [41] | 8/10 | 🗶 | ✓ | ✓ | ✓ | ✓ | 🗶 | ✓ | ✓ | ✓ | ✓ |
| (J. Guise et al., 2017)  [43] | 7/10 | ✓ | 🗶 | ✓ | ✓ | ✓ | 🗶 | 🗶 | ✓ | ✓ | ✓ |

Yes: ✓, No: 🗶, Not clear or Not Applicable: N/A. JBI: Joanna Briggs Institute.
